# Supplementary material for: What’s up doc? A national cross-sectional study of psychological wellbeing of hospital doctors in Ireland
Source: PubMed Central journal article supplement — BMJ Open. 2017 Oct 16;7(10):e018023. doi: 10.1136/bmjopen-2017-018023 (PMC5652523; doi:10.1136/bmjopen-2017-018023), 2017-10-16
Supplement: bmjopen-2017-018023supp001.pdf [file bmjopen-2017-018023supp001.pdf]

## Reliability checking of data

All data returned, whether by post or Survey Monkey, were entered into the database by a single individual. A quality reliability check was carried out systematically on 10% of the raw dataset by the lead researcher and the Research Department Manager. This involved cross-checking the SPSS entry with the original data on the returned questionnaire. Errors were noted in less than 1% of entries and appropriate corrections were made. All the analyses were performed using commercially available statistical software (SPSS version: IBM SPSS for Windows, version 21.0). A preliminary missing data analysis was then performed. Demographic analysis identified that some doctors working exclusively in the private sector had responded and been entered into the database erroneously. These were removed.
