# Supplementary material for: What’s up doc? A national cross-sectional study of psychological wellbeing of hospital doctors in Ireland
Source: PubMed Central journal article supplement — BMJ Open. 2017 Oct 16;7(10):e018023. doi: 10.1136/bmjopen-2017-018023 (PMC5652523; doi:10.1136/bmjopen-2017-018023), 2017-10-16
Supplement: bmjopen-2017-018023supp002.pdf [file bmjopen-2017-018023supp002.pdf]

Supplementary file 2

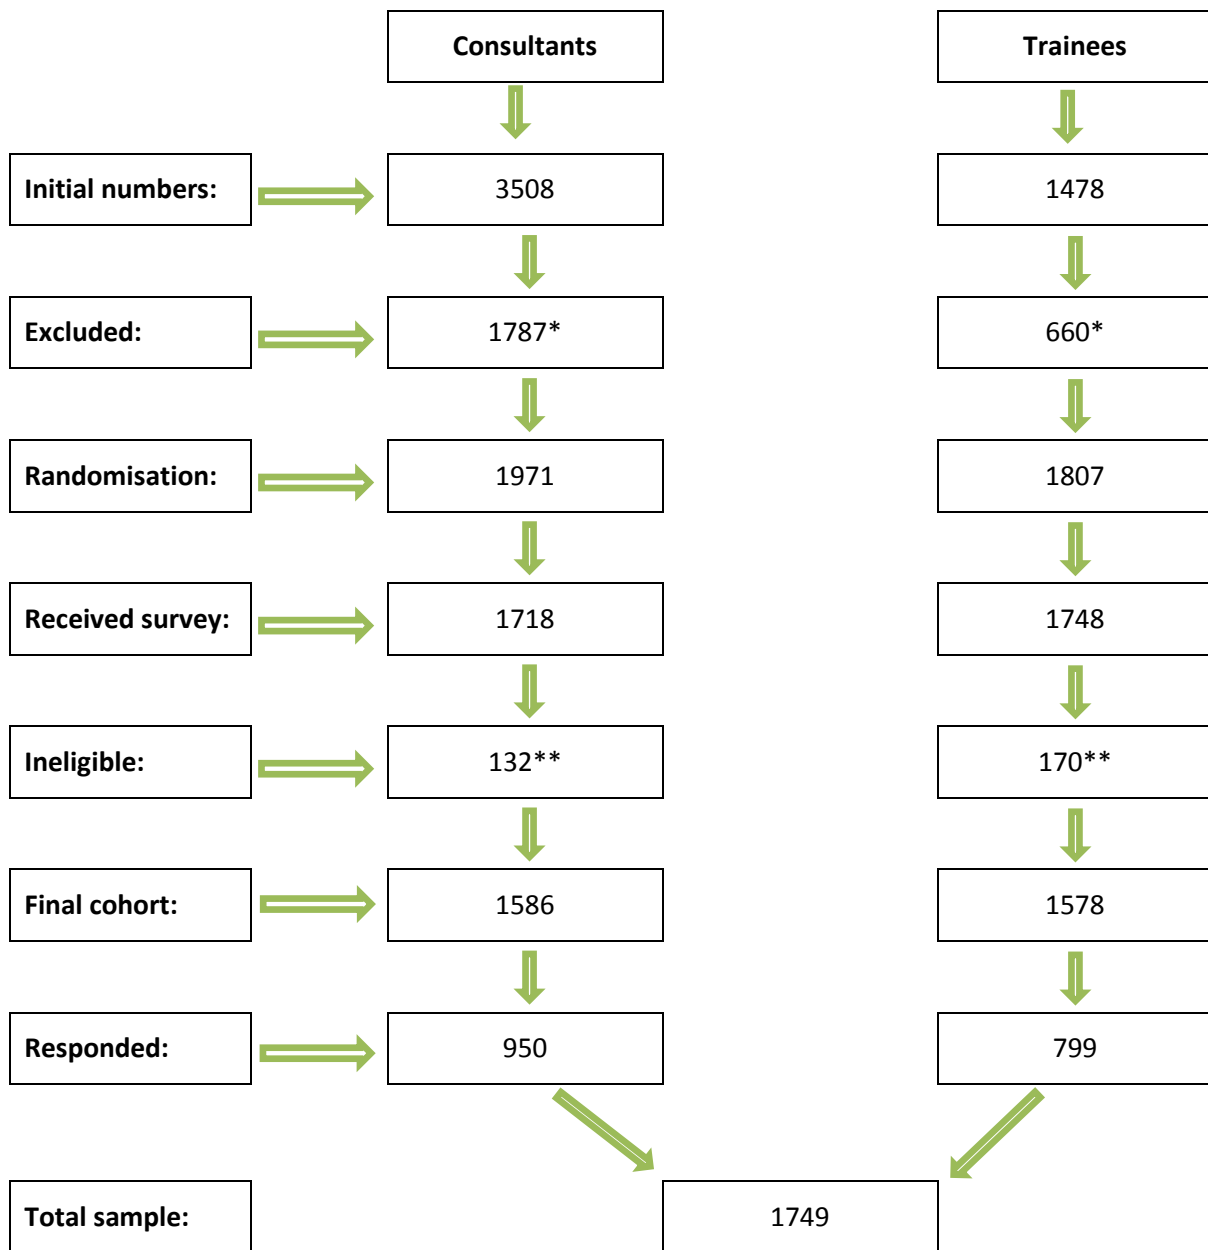

**Flow diagram of recruitment to study**

\*cases that did not meet the inclusion criteria e.g. retired/private practice only, not on training scheme, on maternity leave or other long term leave due to illness or secondment abroad

\*\* respondents who did not meet inclusion criteria e.g. similar reasons to above
